# Supplementary material
Source: publisher figshare collection journal article supplement (https://gsapubs.figshare.com/ndownloader/files/38149146)
Supplement: Supplementary file 1 [file 38149146]

## Sheet: BIOTITI-ANALISI
Table S2	F2-L1-1-1	F2-L1-1-2	F2-L1-1-3	F2-L1-1-4	F2-L1-2-1	F2-L1-2-2	F2-L1-2-3	F2-L1-3-1	F2-L1-3-2	F2-L1-3-3	F2-L1-4-1	F2-L1-4-2	F2-L1-4-3	F2-L1-5-1	F2-L1-5-2	F2-L1-5-3	F2-L1-6-1	F2-L1-6-2	F2-L1-6-3	F2-L1-7-1	F2-L1-7-2	F2-L1-7-3	F2-L2-1-1	F2-L2-1-2	F2-L2-1-3	F2-L2-2-1	F2-L2-2-2	F2-L2-2-3	F2-L2-3-1	F2-L2-3-2	F2-L2-3-3	F2-L2-4-1	F2-L2-4-2	F2-L2-4-3	F2-L2-5-1	F2-L2-5-2	F2-L2-5-3	F2-L3-1-1	F2-L3-1-2	F2-L3-1-3	F2-L3-2-1	F2-L3-2-2	F2-L3-2-3	F2-L3-3-1	F2-L3-3-2	F2-L3-3-3
SiO2	38.27	38.34	38.04	37.09	38.02	37.8	38.13	38.07	38.65	37.74	37.98	38.39	38.26	38.46	37.8	37.81	37.29	38.23	38.53	37.87	38.13	38.86	38.27	38.34	38	38.1	38.19	38.63	38.24	38.78	38.6	37.59	38.09	38.12	37.61	37.91	37.91	38.55	37.79	37.67	38.56	37.78	38.67	37.91	37.66	37.78
TiO2	4.61	4.66	4.77	4.62	5.13	4.72	4.76	4.74	4.51	4.71	4.71	4.59	4.69	4.62	4.59	4.57	4.82	4.79	4.78	4.66	4.71	4.56	4.63	4.75	4.89	4.69	4.7	4.57	4.57	4.44	4.41	4.68	4.45	4.64	4.61	4.67	4.71	4.61	4.47	4.56	4.51	4.36	4.73	4.57	4.62	4.67
Al2O3	13.07	12.64	12.67	12.63	12.79	12.86	12.74	13.11	13.34	12.82	12.79	13.22	13.11	13.14	13.02	12.93	13.02	13	12.95	12.94	13.22	13.6	12.78	13.23	13.16	12.44	12.67	12.97	12.94	13.06	12.87	12.76	13.12	12.86	12.95	13.1	12.66	12.96	12.85	12.71	13.18	12.61	12.96	13.15	13.19	13.06
Fe2O3
FeO	16.24	16.03	16.06	20.02	16.09	16.6	16.29	16.57	16.65	16.68	15.84	16.28	16.15	16.1	15.98	16.51	15.52	15.79	15.23	17.05	16.67	15.36	16.15	16.07	16.1	15.88	15.86	15.93	16.71	16.51	16.44	15.98	16.1	16	17.07	17.19	16.74	16.53	16.95	16.23	16.11	15.89	16.15	16.39	16.66	16.29
MnO	0.3311	0.3201	0.4094	0.3552	0.3284	0.353	0.286	0.323	0.3517	0.3282	0.3027	0.3591	0.2751	0.3674	0.4117	0.3023	0.3514	0.3958	0.275	0.2978	0.3126	0.3312	0.2902	0.3267	0.3738	0.3374	0.4189	0.3604	0.3164	0.3276	0.3065	0.264	0.2554	0.3027	0.3454	0.4129	0.2785	0.3681	0.3531	0.3761	0.3624	0.2773	0.3442	0.2918	0.3702	0.3578
MgO	14.75	15.05	14.3	12.22	13.89	14.56	14.15	14.37	14.81	14.29	14.66	14.68	14.82	14.99	14.6	14.61	13.91	14.63	15.11	14.37	14.26	13.78	14.74	14.96	14.45	14.88	14.96	15.21	14.41	14.66	14.84	14.46	14.7	14.42	14.05	14.22	14.3	14.59	13.57	14.66	14.99	14.52	14.45	14.6	14.49	14.43
CaO	0.046	0.0343	0.015	0.0748	0.1419	0.0124	0.058	0.0731	0.0318	0.0476	0.0671	0.0281	0.0717	0.0301	0.0553	0.0626	0.065	0.0729	0.0617	0.0931	0.0352	0.0247	0.0358	0.0623	0.057	0.0385	0.0504	0.016	0.0144	0.0261	0.0288	0.0772	0.0276	0.0454	0.0416	0.0455	0.0487	0.0558	0.0822	0.0378	0.0063	0.0733	0.0751	0.0362	0.0149	0.0002
Na2O	0.5122	0.3994	0.3838	0.476	0.476	0.4329	0.4525	0.3909	0.4199	0.474	0.5212	0.4676	0.482	0.3676	0.3649	0.4284	0.3917	0.3837	0.3946	0.3704	0.3578	0.1789	0.4432	0.4613	0.4579	0.4161	0.3864	0.4743	0.4288	0.447	0.3918	0.4493	0.4336	0.2077	0.4064	0.5066	0.3836	0.4043	0.3913	0.4224	0.4764	0.403	0.3531	0.3365	0.4786	0.4828
K2O	9.27	9.27	9.1	9.01	8.67	9.28	9.12	9.16	9.39	9.16	8.96	9.36	9.13	9.18	9.1	9.17	9.39	9.05	9.11	8.94	9.14	9.91	9.26	9.21	9.23	9.15	9.18	9.29	9.3	9.41	9.45	9.08	9.31	9.67	9.22	9.1	8.85	9.1	9.11	9.25	9.19	8.95	9.03	9.06	9.43	9.31
Cl	0.1605	0.1354	0.1765	0.1898	0.2235	0.1372	0.1747	0.1769	0.1954	0.1729	0.1899	0.1803	0.1811	0.1787	0.1658	0.2078	0.2224	0.1922	0.2133	0.1709	0.1763	0.1452	0.2273	0.1687	0.1675	0.1559	0.1412	0.143	0.1734	0.1648	0.1565	0.1359	0.1571	0.1558	0.1558	0.1833	0.1682	0.1448	0.2037	0.1857	0.1665	0.1959	0.1706	0.1671	0.1622	0.1493
Cr2O3	0	0	0	0	0	0	0	0	0	0	0	0	0	0	0	0	0	0	0	0	0	0	0	0	0	0	0	0	0	0	0	0	0	0	0	0	0	0	0	0	0	0	0	0	0	0
BaO	0	0	0	0	0	0	0	0	0	0	0	0	0	0	0	0	0	0	0	0	0	0	0	0	0	0	0	0	0	0	0	0	0	0	0	0	0	0	0	0	0	0	0	0	0	0
P2O5	0	0	0	0	0	0	0	0	0	0	0	0	0	0	0	0	0	0	0	0	0	0	0	0	0	0	0	0	0	0	0	0	0	0	0	0	0	0	0	0	0	0	0	0	0	0
Totals wt%	97.2598	96.8792	95.9247	96.6859	95.7599	96.7555	96.1613	96.9839	98.3489	96.4228	96.021	97.5551	97.17	97.4339	96.0877	96.6012	94.9806	96.5347	96.6546	96.7623	97.012	96.75	96.8265	97.5791	96.8863	96.088	96.557	97.5938	97.1031	97.8256	97.4937	95.4765	96.6438	96.4217	96.4593	97.3384	96.049	97.3131	95.7703	96.1021	97.5517	95.0596	96.9331	96.5117	97.076	96.5302
molar weighta
60.09	1.27376	1.27609	1.2661	1.23448	1.26544	1.25811	1.2691	1.2671	1.2864	1.25612	1.2641	1.27775	1.27342	1.28008	1.25811	1.25845	1.24114	1.27242	1.28241	1.26044	1.2691	1.29339	1.27376	1.27609	1.26477	1.2681	1.27109	1.28574	1.27276	1.29073	1.28474	1.25112	1.26777	1.26876	1.25179	1.26177	1.26177	1.28308	1.25778	1.25379	1.28341	1.25745	1.28707	1.26177	1.25345	1.25745
79.9	0.115394	0.116646	0.119399	0.115645	0.128411	0.118148	0.119149	0.118648	0.112891	0.117897	0.117897	0.114894	0.117397	0.115645	0.114894	0.114393	0.120651	0.1199	0.11965	0.116646	0.117897	0.114143	0.115895	0.118899	0.122403	0.117397	0.117647	0.114393	0.114393	0.111139	0.110388	0.117146	0.111389	0.116145	0.115394	0.116896	0.117897	0.115394	0.11189	0.114143	0.112891	0.109136	0.118398	0.114393	0.115645	0.116896
101.94	0.384638	0.371984	0.372866	0.371689	0.376398	0.378458	0.374926	0.385815	0.392584	0.377281	0.376398	0.389052	0.385815	0.386698	0.383167	0.380518	0.383167	0.382578	0.381107	0.380812	0.389052	0.400235	0.376104	0.389347	0.387287	0.366098	0.372866	0.381695	0.380812	0.384344	0.378752	0.375515	0.386109	0.378458	0.381107	0.385521	0.372572	0.381401	0.378164	0.374044	0.387875	0.371101	0.381401	0.386992	0.38817	0.384344
159.7	0	0	0	0	0	0	0	0	0	0	0	0	0	0	0	0	0	0	0	0	0	0	0	0	0	0	0	0	0	0	0	0	0	0	0	0	0	0	0	0	0	0	0	0	0	0
71.85	0.226026	0.223104	0.223521	0.278636	0.223939	0.231037	0.226722	0.230619	0.231733	0.23215	0.220459	0.226583	0.224774	0.224078	0.222408	0.229784	0.216006	0.219763	0.211969	0.2373	0.232011	0.213779	0.224774	0.22366	0.224078	0.221016	0.220738	0.221712	0.232568	0.229784	0.22881	0.222408	0.224078	0.222686	0.237578	0.239248	0.232985	0.230063	0.235908	0.225887	0.224217	0.221155	0.224774	0.228114	0.231872	0.226722
70.94	0.00466732	0.00451226	0.00577107	0.00500705	0.00462926	0.00497604	0.00403158	0.00455314	0.00495771	0.00462644	0.00426699	0.00506202	0.00387793	0.00517902	0.0058035	0.00426135	0.00495348	0.00557936	0.00387652	0.00419791	0.00440654	0.00466873	0.00409078	0.0046053	0.00526924	0.00475613	0.00590499	0.00508035	0.00446011	0.00461799	0.00432055	0.00372145	0.00360023	0.00426699	0.0048689	0.00582041	0.00392585	0.00518889	0.00497745	0.00530166	0.00510854	0.00390894	0.00485199	0.00411334	0.00521849	0.0050437
40.32	0.365823	0.373264	0.354663	0.303075	0.344494	0.361111	0.350942	0.356399	0.367312	0.354415	0.363591	0.364087	0.36756	0.371776	0.362103	0.362351	0.34499	0.362847	0.374752	0.356399	0.353671	0.341766	0.365575	0.371032	0.358383	0.369048	0.371032	0.377232	0.357391	0.363591	0.368056	0.358631	0.364583	0.357639	0.348462	0.352679	0.354663	0.361855	0.336558	0.363591	0.371776	0.360119	0.358383	0.362103	0.359375	0.357887
56.08	0.000820257	0.000611626	0.000267475	0.00133381	0.00253031	0.000221113	0.00103424	0.0013035	0.000567047	0.000848787	0.0011965	0.00050107	0.00127853	0.000536733	0.000986091	0.00111626	0.00115906	0.00129993	0.00110021	0.00166013	0.000627675	0.000440442	0.000638374	0.00111091	0.00101641	0.000686519	0.000898716	0.000285307	0.000256776	0.000465407	0.000513552	0.0013766	0.000492154	0.000809558	0.000741797	0.000811341	0.000868402	0.000995007	0.00146576	0.000674037	0.00011234	0.00130706	0.00133916	0.000645506	0.000265692	3.56633e-06
61.982	0.00826369	0.00644381	0.00619212	0.00767965	0.00767965	0.00698429	0.00730051	0.00630667	0.00677455	0.00764738	0.00840889	0.00754413	0.00777645	0.00593075	0.00588719	0.00691168	0.00631958	0.00619051	0.00636636	0.00597593	0.00577264	0.00288632	0.00715046	0.00744248	0.00738763	0.00671324	0.00623407	0.00765222	0.00691814	0.00721177	0.00632119	0.00724888	0.00699558	0.00335097	0.00655674	0.00817334	0.00618889	0.00652286	0.00631312	0.00681488	0.0076861	0.00650189	0.00569682	0.005429	0.0077216	0.00778936
94.2	0.0984076	0.0984076	0.096603	0.0956476	0.0920382	0.0985138	0.0968153	0.0972399	0.0996815	0.0972399	0.0951168	0.0993631	0.0969214	0.0974522	0.096603	0.0973461	0.0996815	0.0960722	0.0967091	0.0949045	0.0970276	0.105202	0.0983015	0.0977707	0.097983	0.0971338	0.0974522	0.09862	0.0987261	0.0998938	0.100318	0.0963907	0.0988323	0.102654	0.0978769	0.096603	0.093949	0.096603	0.0967091	0.0981953	0.0975584	0.0950106	0.0958599	0.0961783	0.100106	0.0988323
35.5	0.00452113	0.00381408	0.00497183	0.00534648	0.00629577	0.00386479	0.00492113	0.0049831	0.00550423	0.00487042	0.0053493	0.00507887	0.00510141	0.0050338	0.00467042	0.00585352	0.00626479	0.00541408	0.00600845	0.00481408	0.0049662	0.00409014	0.00640282	0.00475211	0.00471831	0.00439155	0.00397746	0.00402817	0.00488451	0.00464225	0.00440845	0.00382817	0.00442535	0.00438873	0.00438873	0.00516338	0.00473803	0.00407887	0.00573803	0.00523099	0.00469014	0.00551831	0.00480563	0.00470704	0.00456901	0.00420563
152	0	0	0	0	0	0	0	0	0	0	0	0	0	0	0	0	0	0	0	0	0	0	0	0	0	0	0	0	0	0	0	0	0	0	0	0	0	0	0	0	0	0	0	0	0	0
153.3	0	0	0	0	0	0	0	0	0	0	0	0	0	0	0	0	0	0	0	0	0	0	0	0	0	0	0	0	0	0	0	0	0	0	0	0	0	0	0	0	0	0	0	0	0	0
141.94	0	0	0	0	0	0	0	0	0	0	0	0	0	0	0	0	0	0	0	0	0	0	0	0	0	0	0	0	0	0	0	0	0	0	0	0	0	0	0	0	0	0	0	0	0	0
totals mol	2.48232	2.47487	2.45036	2.41854	2.45185	2.46143	2.45494	2.47297	2.50841	2.45309	2.45679	2.48992	2.48392	2.49241	2.45463	2.46098	2.42433	2.47207	2.48395	2.46315	2.47453	2.4806	2.47269	2.4947	2.47329	2.45534	2.46784	2.49644	2.47317	2.49642	2.48663	2.43739	2.46827	2.45916	2.44876	2.47269	2.44956	2.48518	2.4355	2.44767	2.49532	2.43121	2.48258	2.46445	2.4664	2.45917
n° oxygens	22	22	22	22	22	22	22	22	22	22	22	22	22	22	22	22	22	22	22	22	22	22	22	22	22	22	22	22	22	22	22	22	22	22	22	22	22	22	22	22	22	22	22	22	22	22
SiO2	11.2889	11.3436	11.3674	11.2293	11.3545	11.2449	11.373	11.2724	11.2824	11.2652	11.3198	11.2897	11.2786	11.299	11.276	11.2499	11.2629	11.3239	11.3581	11.2578	11.283	11.4709	11.3329	11.2534	11.2501	11.3622	11.3314	11.3306	11.3218	11.3747	11.3665	11.2927	11.2997	11.3505	11.2462	11.2262	11.3322	11.3584	11.3616	11.2692	11.3152	11.3787	11.4057	11.2638	11.1807	11.2493
TiO2	1.0227	1.03691	1.072	1.05195	1.1522	1.05599	1.06776	1.05552	0.990112	1.05734	1.05575	1.01516	1.03978	1.02077	1.02975	1.02262	1.09487	1.06704	1.05972	1.04184	1.04818	1.01231	1.03114	1.04853	1.08878	1.05188	1.04878	1.0081	1.01758	0.979425	0.976638	1.05737	0.992826	1.03905	1.03672	1.04005	1.05886	1.02153	1.01071	1.02593	0.995304	0.987577	1.04921	1.02118	1.03154	1.04576
Al2O3	3.40892	3.30669	3.3477	3.38103	3.37735	3.38262	3.35991	3.43229	3.44316	3.38356	3.37056	3.43753	3.41715	3.41331	3.43418	3.40165	3.47711	3.40472	3.37541	3.40128	3.4589	3.54961	3.34627	3.43352	3.44492	3.28026	3.32398	3.36371	3.38751	3.38708	3.35094	3.38942	3.44144	3.38574	3.42391	3.43005	3.34614	3.37635	3.41597	3.36196	3.4197	3.35809	3.37988	3.45466	3.46243	3.43838
Fe2O3	0	0	0	0	0	0	0	0	0	0	0	0	0	0	0	0	0	0	0	0	0	0	0	0	0	0	0	0	0	0	0	0	0	0	0	0	0	0	0	0	0	0	0	0	0	0
FeO	2.0032	1.98325	2.00684	2.53458	2.00936	2.06499	2.03178	2.05163	2.03241	2.08199	1.97416	2.00201	1.99081	1.97789	1.99336	2.05416	1.96018	1.95577	1.87738	2.11948	2.06271	1.89596	1.99986	1.97239	1.99318	1.98032	1.9678	1.95385	2.0688	2.025	2.02436	2.00746	1.99723	1.99218	2.13443	2.12864	2.09249	2.03663	2.13097	2.03031	1.97681	2.00124	1.99189	2.03636	2.06827	2.02828
MnO	0.041365	0.0401111	0.0518144	0.0455461	0.0415375	0.0444753	0.0361291	0.0405057	0.0434816	0.0414912	0.0382099	0.0447262	0.0343466	0.0457142	0.0520146	0.0380944	0.0449512	0.0496531	0.0343338	0.0374943	0.0391767	0.0414061	0.0363965	0.0406127	0.04687	0.0426153	0.052641	0.0447709	0.0396748	0.0406966	0.0382253	0.03359	0.0320893	0.038173	0.0437428	0.0517853	0.0352589	0.0459346	0.0449615	0.0476521	0.0450394	0.035372	0.0429971	0.0367195	0.0465485	0.0451215
MgO	3.24218	3.31807	3.18426	2.75689	3.09108	3.22758	3.14498	3.17059	3.22151	3.17849	3.25588	3.21694	3.25546	3.28159	3.2454	3.23925	3.13067	3.22913	3.31913	3.18323	3.14434	3.03106	3.2526	3.27201	3.18782	3.30669	3.30762	3.32438	3.17916	3.20419	3.25631	3.23702	3.24958	3.19949	3.13063	3.13785	3.1853	3.20332	3.04014	3.26801	3.27776	3.25872	3.1759	3.23247	3.20559	3.20169
CaO	0.00726968	0.00543696	0.00240147	0.0121328	0.022704	0.00197628	0.00926834	0.0115961	0.00497329	0.00761216	0.0107144	0.00442727	0.0113239	0.00473764	0.00883798	0.00997886	0.0105181	0.0115686	0.00974445	0.0148277	0.00558039	0.0039062	0.00567974	0.00979678	0.00904094	0.00615126	0.00801175	0.00251428	0.00228415	0.00410145	0.00454356	0.0124253	0.00438663	0.00724242	0.0066644	0.00721866	0.00779929	0.00880829	0.0132403	0.00605835	0.000990441	0.0118276	0.0118673	0.0057624	0.00236995	3.19048e-05
Na2O	0.0732385	0.0572812	0.0555946	0.0698571	0.0689081	0.0624249	0.0654237	0.0561054	0.0594162	0.0685838	0.0752998	0.0666572	0.0688757	0.0523496	0.0527648	0.0617872	0.0573481	0.055092	0.0563861	0.0533749	0.0513222	0.0255982	0.0636191	0.0656329	0.0657131	0.0601511	0.0555746	0.0674357	0.0615401	0.0635546	0.0559256	0.0654287	0.0623525	0.0299783	0.0589066	0.0727198	0.0555837	0.0577436	0.0570267	0.0612532	0.0677645	0.0588356	0.0504838	0.0484643	0.0688759	0.0696844
K2O	0.872156	0.87478	0.867329	0.870048	0.825842	0.880507	0.867613	0.865065	0.874257	0.872074	0.85175	0.877936	0.858429	0.860192	0.865818	0.870228	0.904577	0.854987	0.85654	0.847653	0.862632	0.933014	0.874608	0.862208	0.871561	0.870326	0.868754	0.869095	0.878216	0.880326	0.88755	0.870027	0.880904	0.918356	0.879338	0.859495	0.843775	0.855177	0.873578	0.882594	0.860123	0.859752	0.849487	0.858578	0.892937	0.884164
Cl	0.0400693	0.0339047	0.0446385	0.0486337	0.0564908	0.0345431	0.0441008	0.0443306	0.0482748	0.0436793	0.0479018	0.0448751	0.0451829	0.0444324	0.0418593	0.0523277	0.0568509	0.0481823	0.0532161	0.0429977	0.0441524	0.0362747	0.0569672	0.0419074	0.0419695	0.0393486	0.0354578	0.0354985	0.04345	0.0409104	0.039003	0.0345532	0.0394437	0.0392622	0.0394289	0.0459396	0.0425532	0.0361082	0.0518319	0.0470169	0.0413506	0.0499352	0.0425863	0.0420195	0.0407552	0.037624
Cr2O3	0	0	0	0	0	0	0	0	0	0	0	0	0	0	0	0	0	0	0	0	0	0	0	0	0	0	0	0	0	0	0	0	0	0	0	0	0	0	0	0	0	0	0	0	0	0
BaO	0	0	0	0	0	0	0	0	0	0	0	0	0	0	0	0	0	0	0	0	0	0	0	0	0	0	0	0	0	0	0	0	0	0	0	0	0	0	0	0	0	0	0	0	0	0
P2O5	0	0	0	0	0	0	0	0	0	0	0	0	0	0	0	0	0	0	0	0	0	0	0	0	0	0	0	0	0	0	0	0	0	0	0	0	0	0	0	0	0	0	0	0	0	0
Elements apfu
Si	5.64445	5.67179	5.68371	5.61466	5.67726	5.62245	5.68652	5.63618	5.6412	5.6326	5.65989	5.64487	5.63932	5.64951	5.63801	5.62495	5.63146	5.66193	5.67907	5.62891	5.6415	5.73543	5.66643	5.6267	5.62507	5.68112	5.66569	5.66532	5.66089	5.68736	5.68325	5.64635	5.64987	5.67527	5.62312	5.61312	5.66612	5.67921	5.68079	5.63461	5.65758	5.68933	5.70285	5.63189	5.59034	5.62463
Ti	0.511351	0.518453	0.536	0.525974	0.576102	0.527996	0.533878	0.527759	0.495056	0.528668	0.527873	0.507579	0.519889	0.510386	0.514875	0.511309	0.547433	0.53352	0.52986	0.520919	0.524088	0.506155	0.51557	0.524264	0.544388	0.525942	0.524392	0.504048	0.50879	0.489713	0.488319	0.528685	0.496413	0.519525	0.518358	0.520024	0.52943	0.510763	0.505353	0.512966	0.497652	0.493788	0.524607	0.51059	0.515769	0.522882
Al	2.27262	2.20446	2.2318	2.25402	2.25157	2.25508	2.23994	2.28819	2.29544	2.2557	2.24704	2.29168	2.2781	2.27554	2.28946	2.26777	2.31807	2.26982	2.25027	2.26752	2.30593	2.36641	2.23085	2.28902	2.29661	2.18684	2.21599	2.24247	2.25834	2.25805	2.23396	2.25961	2.29429	2.25716	2.28261	2.2867	2.23076	2.2509	2.27731	2.24131	2.2798	2.23873	2.25325	2.30311	2.30829	2.29225
Fe3	0	0	0	0	0	0	0	0	0	0	0	0	0	0	0	0	0	0	0	0	0	0	0	0	0	0	0	0	0	0	0	0	0	0	0	0	0	0	0	0	0	0	0	0	0	0
Fe2	2.0032	1.98325	2.00684	2.53458	2.00936	2.06499	2.03178	2.05163	2.03241	2.08199	1.97416	2.00201	1.99081	1.97789	1.99336	2.05416	1.96018	1.95577	1.87738	2.11948	2.06271	1.89596	1.99986	1.97239	1.99318	1.98032	1.9678	1.95385	2.0688	2.025	2.02436	2.00746	1.99723	1.99218	2.13443	2.12864	2.09249	2.03663	2.13097	2.03031	1.97681	2.00124	1.99189	2.03636	2.06827	2.02828
Mn	0.041365	0.0401111	0.0518144	0.0455461	0.0415375	0.0444753	0.0361291	0.0405057	0.0434816	0.0414912	0.0382099	0.0447262	0.0343466	0.0457142	0.0520146	0.0380944	0.0449512	0.0496531	0.0343338	0.0374943	0.0391767	0.0414061	0.0363965	0.0406127	0.04687	0.0426153	0.052641	0.0447709	0.0396748	0.0406966	0.0382253	0.03359	0.0320893	0.038173	0.0437428	0.0517853	0.0352589	0.0459346	0.0449615	0.0476521	0.0450394	0.035372	0.0429971	0.0367195	0.0465485	0.0451215
Mg	3.24218	3.31807	3.18426	2.75689	3.09108	3.22758	3.14498	3.17059	3.22151	3.17849	3.25588	3.21694	3.25546	3.28159	3.2454	3.23925	3.13067	3.22913	3.31913	3.18323	3.14434	3.03106	3.2526	3.27201	3.18782	3.30669	3.30762	3.32438	3.17916	3.20419	3.25631	3.23702	3.24958	3.19949	3.13063	3.13785	3.1853	3.20332	3.04014	3.26801	3.27776	3.25872	3.1759	3.23247	3.20559	3.20169
Ca	0.00726968	0.00543696	0.00240147	0.0121328	0.022704	0.00197628	0.00926834	0.0115961	0.00497329	0.00761216	0.0107144	0.00442727	0.0113239	0.00473764	0.00883798	0.00997886	0.0105181	0.0115686	0.00974445	0.0148277	0.00558039	0.0039062	0.00567974	0.00979678	0.00904094	0.00615126	0.00801175	0.00251428	0.00228415	0.00410145	0.00454356	0.0124253	0.00438663	0.00724242	0.0066644	0.00721866	0.00779929	0.00880829	0.0132403	0.00605835	0.000990441	0.0118276	0.0118673	0.0057624	0.00236995	3.19048e-05
Na	0.146477	0.114562	0.111189	0.139714	0.137816	0.12485	0.130847	0.112211	0.118832	0.137168	0.1506	0.133314	0.137751	0.104699	0.10553	0.123574	0.114696	0.110184	0.112772	0.10675	0.102644	0.0511965	0.127238	0.131266	0.131426	0.120302	0.111149	0.134871	0.12308	0.127109	0.111851	0.130857	0.124705	0.0599565	0.117813	0.14544	0.111167	0.115487	0.114053	0.122506	0.135529	0.117671	0.100968	0.0969287	0.137752	0.139369
K	1.74431	1.74956	1.73466	1.7401	1.65168	1.76101	1.73523	1.73013	1.74851	1.74415	1.7035	1.75587	1.71686	1.72038	1.73164	1.74046	1.80915	1.70997	1.71308	1.69531	1.72526	1.86603	1.74922	1.72442	1.74312	1.74065	1.73751	1.73819	1.75643	1.76065	1.7751	1.74005	1.76181	1.83671	1.75868	1.71899	1.68755	1.71035	1.74716	1.76519	1.72025	1.7195	1.69897	1.71716	1.78587	1.76833
Cl	0.0400693	0.0339047	0.0446385	0.0486337	0.0564908	0.0345431	0.0441008	0.0443306	0.0482748	0.0436793	0.0479018	0.0448751	0.0451829	0.0444324	0.0418593	0.0523277	0.0568509	0.0481823	0.0532161	0.0429977	0.0441524	0.0362747	0.0569672	0.0419074	0.0419695	0.0393486	0.0354578	0.0354985	0.04345	0.0409104	0.039003	0.0345532	0.0394437	0.0392622	0.0394289	0.0459396	0.0425532	0.0361082	0.0518319	0.0470169	0.0413506	0.0499352	0.0425863	0.0420195	0.0407552	0.037624
Cr	0	0	0	0	0	0	0	0	0	0	0	0	0	0	0	0	0	0	0	0	0	0	0	0	0	0	0	0	0	0	0	0	0	0	0	0	0	0	0	0	0	0	0	0	0	0
Ba	0	0	0	0	0	0	0	0	0	0	0	0	0	0	0	0	0	0	0	0	0	0	0	0	0	0	0	0	0	0	0	0	0	0	0	0	0	0	0	0	0	0	0	0	0	0
P	0	0	0	0	0	0	0	0	0	0	0	0	0	0	0	0	0	0	0	0	0	0	0	0	0	0	0	0	0	0	0	0	0	0	0	0	0	0	0	0	0	0	0	0	0	0
sum	15.6533	15.6396	15.5873	15.6723	15.5156	15.6649	15.5927	15.6131	15.6497	15.6515	15.6158	15.6463	15.629	15.6149	15.621	15.6619	15.624	15.5797	15.5789	15.6174	15.5954	15.5338	15.6408	15.6324	15.6195	15.63	15.6263	15.6459	15.6409	15.6378	15.6549	15.6306	15.6498	15.625	15.6555	15.6557	15.5884	15.5975	15.6058	15.6756	15.6328	15.6161	15.5459	15.613	15.7016	15.6602

## Sheet: G50503
Villa, I.M., and Bosio, G., 2023, “Excess Ar” by laboratory alteration of biotite: Geology, https://doi.org/10.1130/G50503.1
